# Supplementary material for: Hepatitis A Outbreak Characteristics: A Comparison of Regions with Different Vaccination Strategies, Spain 2010–2018
Source: MDPI journal article supplement (doi:10.3390/vaccines9111214), 2021-10-20
Supplement: s1 [file s1]

**Supplementary Table S1.** Number and cumulative incidence rate per million inhabitants of hepatitis A outbreaks in regions with different vaccination strategies. Spain, 2010-2016

|                              | Regions with<br>universal<br>vaccination strategy<br>N=93<br>N (CIR) | Regions with risk<br>group vaccination<br>strategy<br>N=180<br>N (CIR) | Rate ratio<br>(95% CI) | P value |
|------------------------------|----------------------------------------------------------------------|------------------------------------------------------------------------|------------------------|---------|
| <b>Outbreak incidence</b>    | 12.43                                                                | 11.32                                                                  | 1.10 (0.85-1.41)       | 0.46    |
| <b>Transmission mode</b>     |                                                                      |                                                                        |                        |         |
| Common source                | 9 (1.20)                                                             | 13 (0.82)                                                              | 1.47 (0.60-3.46)       | 0.38    |
| Person-to-person             | 71 (9.49)                                                            | 153 (9.62)                                                             | 0.98 (0.74-1.30)       | 0.93    |
| <b>Setting</b>               |                                                                      |                                                                        |                        |         |
| Family/household             | 68 (9.09)                                                            | 142 (8.9)                                                              | 1.02 (0.76-1.36)       | 0.90    |
| School                       | 6 (0.80)                                                             | 17 (1.07)                                                              | 0.75 (0.27-1.85)       | 0.56    |
| Leisure facility/summer camp | 1 (0.13)                                                             | 1 (0.06)                                                               | 2.12 (0.05-82.85)      | 0.99    |
| Community/other/various      | 5 (0.67)                                                             | 16 (1.01)                                                              | 0.66 (0.22-1.75)       | 0.44    |
| Other closed facilities      | 0 (0)                                                                | 2 (0.12)                                                               | 0.42 (0.02-8.85)       | 0.57    |
| <b>Imported outbreak</b>     | 49 (6.55)                                                            | 47 (2.96)                                                              | 2.21 (1.48-3.31)       | 0.001   |

CIR: cumulative incidence rate

**Supplementary Table S2.** Characteristics of common source and person-to-person hepatitis A outbreaks in regions with different vaccination strategies. Spain, 2010-2016

|                                                      | Regions with<br>universal<br>vaccination<br>strategy<br>N=93 | Regions with<br>risk group<br>vaccination<br>strategy<br>N=180 | Crude odds ratio<br>(95% CI) | P<br>value | Adjusted<br>odds ratio<br>(95% CI) | P<br>value |
|------------------------------------------------------|--------------------------------------------------------------|----------------------------------------------------------------|------------------------------|------------|------------------------------------|------------|
| <b>COMMON SOURCE OUTBREAKS</b>                       |                                                              |                                                                |                              |            |                                    |            |
| <b>Setting</b>                                       |                                                              |                                                                |                              |            |                                    |            |
| Family/household                                     | 8 (100%)                                                     | 11 (100%)                                                      | -                            |            | -                                  |            |
| <b>Imported outbreak</b>                             | 6 (66.7%)                                                    | 6 (50.0%)                                                      | 2.00 (0.33-11.97)            | 0.45       | 1.32 (0.10-7.10)                   | 0.47       |
| <b>No. of exposed people,</b><br>median (range)      | 6 (3-10)                                                     | 5 (2-56)                                                       |                              | 0.88       |                                    |            |
| <b>No. of affected people,</b><br>median (range)     | 2 (2-5)                                                      | 2 (2-4)                                                        |                              | 0.29       |                                    |            |
| <b>No. of hospitalized cases,</b><br>median (range)  | 0 (0-2)                                                      | 2 (0-3)                                                        |                              | 0.07       |                                    |            |
| <b>PERSON-TO-PERSON TRANSMISSION OUTBREAKS</b>       |                                                              |                                                                |                              |            |                                    |            |
| <b>Setting</b>                                       |                                                              |                                                                |                              |            |                                    |            |
| Family/household                                     | 51 (83.6%)                                                   | 119 (77.8%)                                                    | Ref.                         |            | Ref.                               |            |
| School                                               | 5 (8.2%)                                                     | 16 (10.5%)                                                     | 0.73 (0.25-2.10)             | 0.56       | 1.67 (0.58-6.66)                   | 0.28       |
| Leisure facility/summer camp                         | 1 (1.6%)                                                     | 1 (0.7%)                                                       | 2.33 (0.14-38.03)            | 0.55       | 2.50 (0.13-47.52)                  | 0.54       |
| Community/other/various                              | 4 (6.6%)                                                     | 15 (9.8%)                                                      | 0.62 (0.20-1.97)             | 0.42       | 0.46 (0.10-2.20)                   | 0.33       |
| Other closed facilities                              | 0 (0%)                                                       | 2 (1.3%)                                                       | -                            |            | -                                  |            |
| <b>Imported outbreak</b>                             | 34 (60.7%)                                                   | 38 (32.2%)                                                     | 3.25 (1.68-6.30)             | <0.001     | 3.42 (1.68-6.94)                   | 0.001      |
| <b>No. of exposed people,</b><br>median (range)      | 6 (2-422)                                                    | 5 (2-473)                                                      |                              | 0.48       |                                    |            |
| <b>No. of affected people,</b><br>median (range)     | 2 (2-218)                                                    | 2 (2-24)                                                       |                              | 0.53       |                                    |            |
| <b>No. of hospitalized people,</b><br>median (range) | 0 (0-2)                                                      | 1 (0-14)                                                       |                              | 0.001      |                                    |            |
